# Supplementary material for: SARS2 simplified scores to estimate risk of hospitalization and death among patients with COVID-19
Source: PubMed Central journal article supplement — medRxiv. 2020 Sep 13:2020.09.11.20190520. Preprint. [Version 1] doi: 10.1101/2020.09.11.20190520 (PMC7491527; doi:10.1101/2020.09.11.20190520), 2020-09-13
Supplement: 96569-2020.09.11.20190520-1.pdf [file 96569-2020.09.11.20190520-1.pdf]

# SARS2 simplified scores to estimate risk of hospitalization and death among patients with COVID-19

Hesam Dashti<sup>1</sup>, Elise C. Roche<sup>1</sup>, David William Bates<sup>1</sup>, Samia Mora<sup>1,\*</sup>, Olga Demler<sup>1</sup>

<sup>1</sup>Center for Lipid Metabolomics, Division of Preventive Medicine, Brigham and Women's Hospital and Harvard Medical School, Boston, MA

\* smora@bwh.harvard.edu

## **Supplements.**

Supplementary Figure 1. SARS2 scores heatmap.

Supplementary Figure 2. Receiver operating characteristic and calibration plots.

Supplementary Table 1. Characteristics of MGB employees and non-employees.

Supplementary Table 2. Odds ratios of the GLM for predicting hospitalization of the patients when age and median household income are categorized

Supplementary Table 3. Results of the sensitivity analysis on COVID-19 test date.

**Supplementary Figure 1. SARS2 scores heatmap.** Scaled risk scores are divided to female patients with lower risks (left panel) and male patients (right panel). The columns in each panel represent different smoking status. Every row indicates an age category. Each matrix shows the three median household incomes in rows, and columns of these matrices indicate four race groups. The cells are colored from light-blue (lowest score: 0) to dark red (highest score: 68). The top panel indicates score ranges corresponding to low, intermediate, and high-risk groups for hospitalizations and mortality among hospitalized patients.

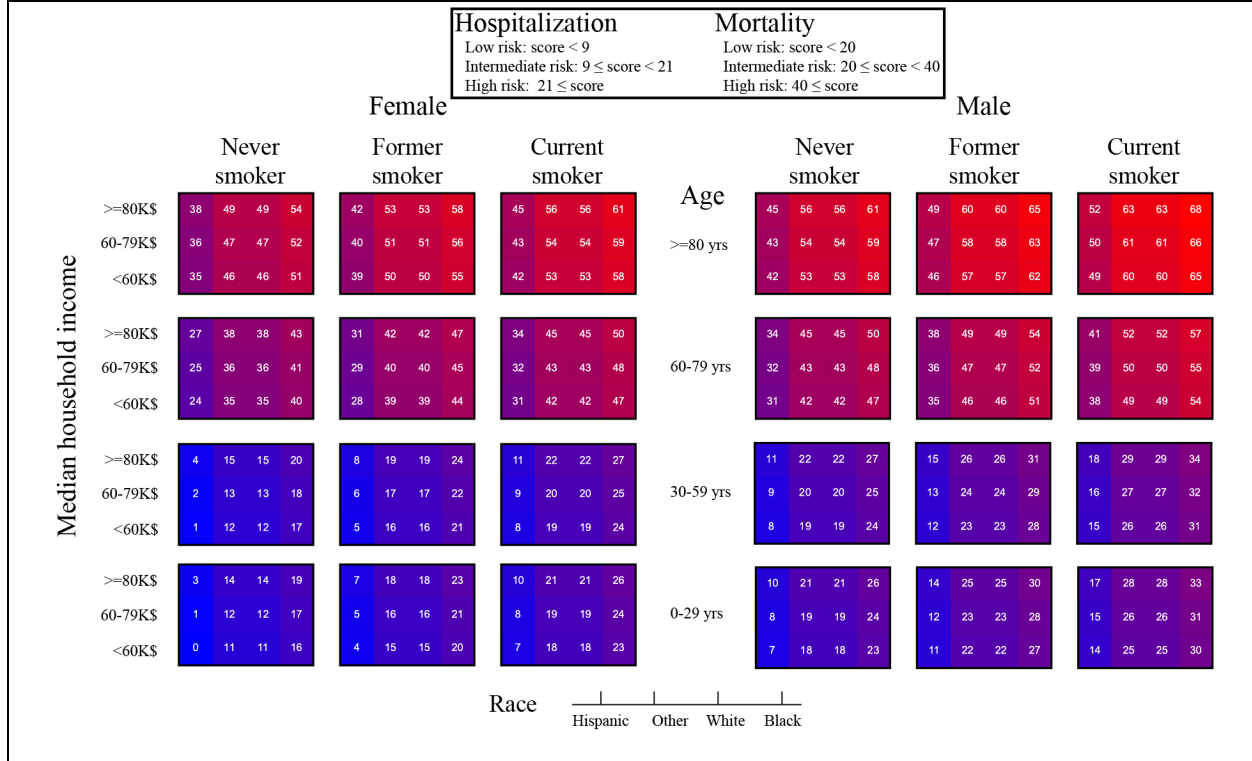

**Supplementary Figure 2.** (a) Receiver operating characteristic (ROC) curve of the model for predicting hospitalization when the model applied on the validation cohort of MGB employees. (b) The Hosmer-Lemeshow GOF plot for the model predicting hospitalization on the validation population (number of bins: 15, p-value: 0.11). The higher rate of observed hospitalizations compared to the mean predicted risks could be due to the use of MGB employees as the validation group which have a better access to medical facilities. (c) ROC of the model for predicting mortality among hospitalized patients. (d) The Hosmer-Lemeshow GOF plot for the model predicting mortality on the hospitalized patients (number of bins: 15, p-value: 0.62).

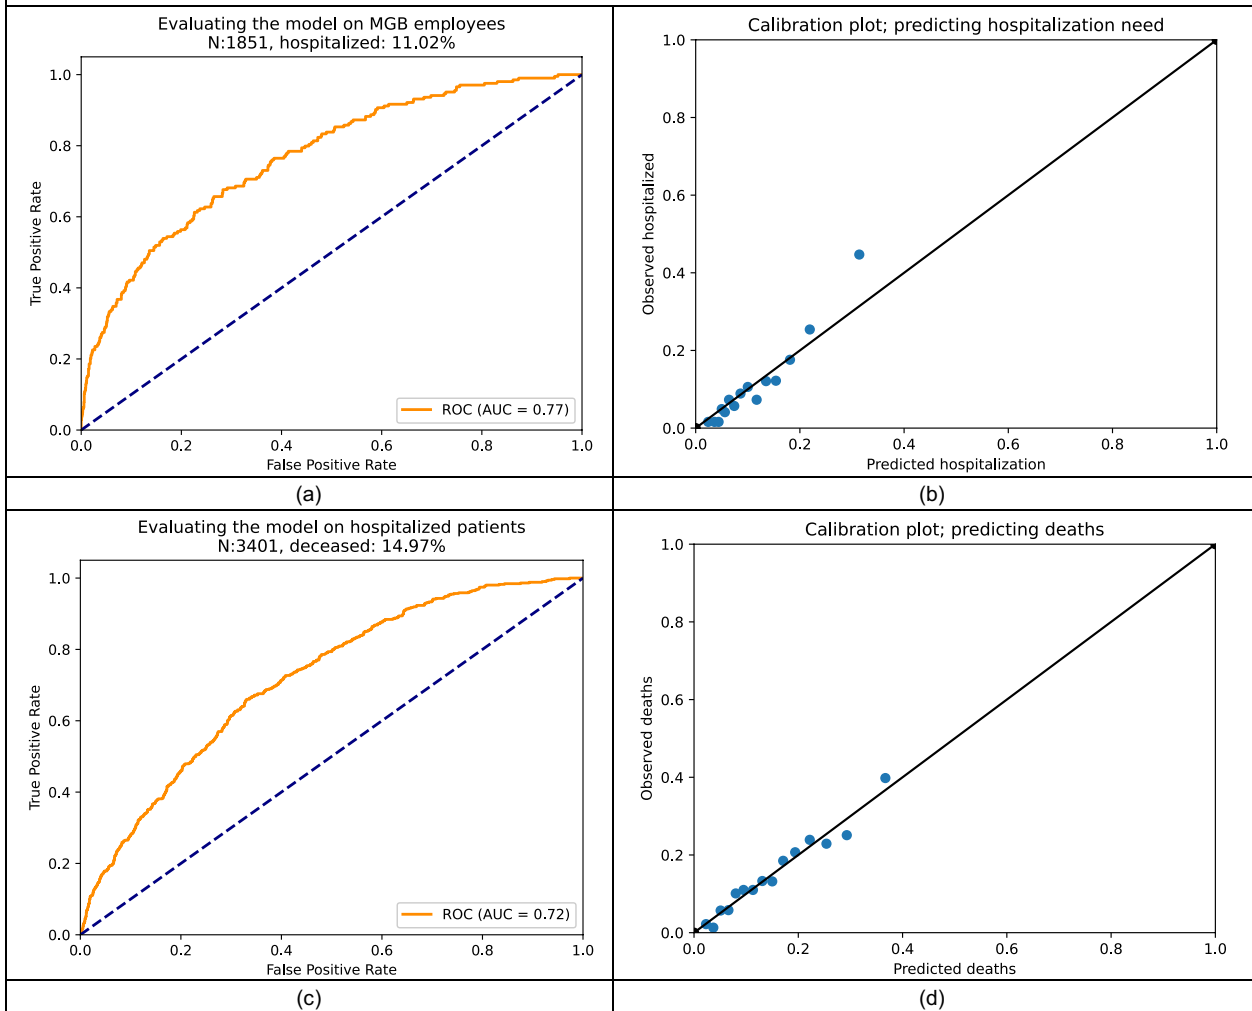

**Supplementary Table 1. Characteristics of MGB employees and non-employees.**

| <b>Characteristics</b>                         | <b>Non-employees<br/>N=10496</b> | <b>Employees<br/>N=1851</b> |
|------------------------------------------------|----------------------------------|-----------------------------|
| Age (years), Median (IQR)                      | 48.0 (32.0-64.0)                 | 41.0 (30.0-54.0)            |
| Women, N (%)                                   | 5251 (50.03)                     | 1334 (71.88)                |
| Race, N (%)                                    |                                  |                             |
| White                                          | 4444 (42.34)                     | 837 (45.10)                 |
| Black                                          | 1472 (14.02)                     | 492 (26.51)                 |
| Hispanic                                       | 974 (9.28)                       | 143 (7.70)                  |
| Other/Not recorded                             | 3606 (34.36)                     | 379 (20.42)                 |
| Median household income (\$1000), Median (IQR) | 60.4 (53.3-86.2)                 | 70.2 (55.0-96.8)            |
| Smoking, N (%)                                 |                                  |                             |
| Current                                        | 489 (4.66)                       | 63 (3.39)                   |
| Former                                         | 1772 (16.88)                     | 253 (13.63)                 |
| Never                                          | 5715 (54.44)                     | 1223 (65.89)                |
| Unknown                                        | 2520 (24.01)                     | 312 (16.81)                 |

IQR: interquartile range

**Supplementary Table 2.** Odds ratios of the GLM for predicting hospitalization of the patients when age and median household income are categorized (N=10,496).

| Variables                        | Median (IQR), N (%) | OR (95% CI)      | P       |
|----------------------------------|---------------------|------------------|---------|
| Age (year)                       |                     |                  | <0.001* |
| 0-29                             | 2149 (20.47)        | 0.39 (0.33-0.45) | <.001   |
| 30-59                            | 5040 (48.02)        | ref              | ref     |
| 60-79                            | 2245 (21.39)        | 3.13 (2.80-3.50) | <.001   |
| ≥80                              | 1062 (10.12)        | 5.61 (4.83-6.54) | <.001   |
| Sex                              |                     |                  |         |
| Female                           | 5251 (50.03)        | ref              | ref     |
| Male                             | 5245 (49.97)        | 1.39 (1.27-1.53) | <.001   |
| Race                             |                     |                  | <0.001* |
| White                            | 4444 (42.34)        | ref              | ref     |
| Black                            | 1472 (14.02)        | 1.30 (1.13-1.49) | <.001   |
| Hispanic                         | 974 (9.28)          | 0.58 (0.48-0.69) | <.001   |
| Other/Not recorded               | 3606 (34.36)        | 1.00 (0.89-1.12) | 0.95    |
| Median household income (\$1000) |                     |                  | <0.001* |
| <60                              | 4412 (42.04)        | ref              | ref     |
| 60-79                            | 2936 (27.97)        | 0.94 (0.83-1.05) | 0.25    |
| ≥80                              | 3148 (29.99)        | 0.87 (0.78-0.98) | 0.02    |
| Smoking                          |                     |                  | <.001*  |
| Current                          | 489 (4.66)          | 1.42 (1.16-1.74) | <.001   |
| Former                           | 1772 (16.88)        | 1.25 (1.10-1.41) | <.001   |
| Never                            | 5715 (54.45)        | ref              | ref     |
| Unknown                          | 2520 (24.01)        | 0.52 (0.46-0.60) | <.001   |

Each variable shown was mutually adjusted for the other variables in the table. IQR: interquartile range. Medians, interquartile ratios, and percentages are reported on the derivation population. \* Test of trend p-value.

| Supplementary Table 3. Results of the sensitivity analysis on COVID-19 test date. |                                                                      |                  |        |                                                                     |                  |        |                                            |                  |        |
|-----------------------------------------------------------------------------------|----------------------------------------------------------------------|------------------|--------|---------------------------------------------------------------------|------------------|--------|--------------------------------------------|------------------|--------|
| Variables                                                                         | COVID-19 tested before April 29, 2020<br>(MGB non-employees N=6,624) |                  |        | COVID-19 tested after April 29, 2020<br>(MGB non-employees N=3,872) |                  |        | Main model<br>(MGB non-employees N=10,496) |                  |        |
|                                                                                   | Median (IQR),<br>N (%)                                               | OR (95% CI)      | P      | Median (IQR),<br>N (%)                                              | OR (95% CI)      | P      | Median (IQR),<br>N (%)                     | OR (95% CI)      | P      |
| Age (years)                                                                       | 51.0 (35.0-65.0)                                                     | 1.58 (1.53-1.63) | <.001  | 43.0 (28.0-61.0)                                                    | 1.44 (1.38-1.50) | <.001  | 48.0 (32.0-64.0)                           | 1.53 (1.49-1.57) | <.001  |
| Sex                                                                               |                                                                      |                  |        |                                                                     |                  |        |                                            |                  |        |
| Female                                                                            | 3285 (49.6)                                                          | ref              | ref    | 1966 (50.8)                                                         | ref              | ref    | 5251 (50.03)                               | ref              | ref    |
| Male                                                                              | 3339 (50.4)                                                          | 1.46 (1.31-1.64) | <.001  | 1906 (49.2)                                                         | 1.30 (1.10-1.52) | 0.002  | 5245 (49.97)                               | 1.40 (1.28-1.54) | <.001  |
| Race                                                                              |                                                                      |                  | <.001* |                                                                     |                  | <.001* |                                            |                  | <.001* |
| White                                                                             | 2741 (41.4)                                                          | ref              | Ref    | 1703 (44.0)                                                         | ref              | ref    | 4444 (42.3)                                | ref              | ref    |
| Black                                                                             | 957 (14.4)                                                           | 1.21 (1.02-1.43) | 0.03   | 515 (13.3)                                                          | 1.48 (1.17-1.87) | <.001  | 1472 (14.0)                                | 1.30 (1.13-1.49) | <.001  |
| Hispanic                                                                          | 627 (9.5)                                                            | 0.64 (0.51-0.79) | <.001  | 347 (9.0)                                                           | 0.40 (0.27-0.58) | <.001  | 974 (9.3)                                  | 0.58 (0.48-0.70) | <.001  |
| Other/Not recorded                                                                | 2299 (34.7)                                                          | 1.03 (0.90-1.19) | 0.66   | 1307 (33.8)                                                         | 0.94 (0.76-1.15) | 0.54   | 3606 (34.4)                                | 1.02 (0.91-1.15) | 0.74   |
| Median household income (\$1000)                                                  | 60.4 (53.3-88.7)                                                     | 0.95 (0.93-0.97) | <.001  | 60.4 (53.3-85.3)                                                    | 1.04 (1.01-1.07) | 0.005  | 60.4 (53.3-86.2)                           | 0.98 (0.96-0.99) | 0.007  |
| Smoking                                                                           |                                                                      |                  | <.001* |                                                                     |                  | <.001* |                                            |                  | <.001* |
| Current                                                                           | 296 (4.5)                                                            | 1.40 (1.08-1.81) | 0.01   | 193 (5.0)                                                           | 1.60 (1.15-2.22) | 0.005  | 489 (4.7)                                  | 1.44 (1.17-1.76) | <.001  |
| Former                                                                            | 1213 (18.3)                                                          | 1.15 (0.99-1.33) | 0.08   | 559 (14.4)                                                          | 1.33 (1.07-1.65) | 0.009  | 1772 (16.9)                                | 1.22 (1.08-1.38) | 0.002  |
| Never                                                                             | 3666 (55.3)                                                          | ref              | ref    | 2049 (52.9)                                                         | ref              | ref    | 5715 (54.4)                                | ref              | ref    |
| Unknown                                                                           | 1449                                                                 | 0.51 (0.44-0.60) | <.001  | 1071 (27.7)                                                         | 0.58 (0.47-0.73) | <.001  | 2520 (24.0)                                | 0.53 (0.46-0.60) | <.001  |

Each variable shown was mutually adjusted for the other variables in the table. IQR: interquartile range. Medians, interquartile ratios, and percentages are reported on the derivation population. Odd ratios (OR) and the corresponding 95% confidence interval (CI) for age is reported per 10 years increment, and these values for median household income are shown per 10,000\$. \* Test of trend p-value.
